# Supplementary material
Source: Springer Nature journal article supplement (https://www.springermedizin.de/resource/supplementary/13063_2013_1957_MOESM2_ESM.docx/9622054)
Supplement: MOESM2 [file 9622054]

**Table 1 Data collection at the standard assessments**

|  | **Pre randomisation** | **Post randomisation** | | | | | | |
| --- | --- | --- | --- | --- | --- | --- | --- | --- |
|  | **Day of surgery** | **4 weeks** | **Months** | | | | |
|  | **3** | **6** | **12** | **24** | **36** |
| Weight | X | X | X | X | X | X | X | X |
| Height | X |  |  |  |  |  |  |  |
| Blood pressure | X |  | X | X | X | X | X | X |
| Waist circumference | X |  | X | X | X | X | X | X |
| SF12 | X |  | X |  | X | X | X | X |
| EQ-5D | X |  | X |  | X | X | X | X |
| IWQOL-Lite | X |  | X |  | X | X | X | X |
| GIQLI | X |  | X |  | X | X | X | X |
| HADS | X |  | X |  | X | X | X | X |
| Resource use questionnaires | X |  | X | X | X | X | X | X |
| Nutritional blood tests ***  Full blood count  Electrolytes  Creatinine  Fasting glucose  Lipids  HbA1c  Liver function tests  Iron, ferritin, vitamin B12  Folate/red cell folate  Lipid profile  25-hydroxyvitamin D  Calcium  Parathyroid hormone | X  X  X  X  X  X X X X X X X X |  | X  X  X  X  X  X X X X X X X X |  | X  X  X  X  X  X X X X X X X X | X  X  X  X  X  X X X X X X X X | X  X  X  X  X  X X X X X X X X | X  X  X  X  X  X X X X X X X X |
| Blood sample for future research | X |  |  |  |  |  |  | X |
| 24 hour recall eating questionnaire | X |  |  | X | X | X | X | X |
| Binge eating questionnaire | X |  | X | X | X | X | X | X |
| Other co-morbidity  Sleep apnoea  STOP-BANG  Epworth sleepiness scale  Non-alcoholic fatty liver disease** | X  X  X |  |  | X | X | X | X | X  X |
| National bariatric surgery registry |  |  | X |  | X | X | X | X |
| In-depth interviews* | X |  | X | X | X | X | X | X |

*undertaken in a purposeful sample of participants

**enhanced liver fibrosis test

***for the assessment of co-morbidities
